# Supplementary material
Source: publisher site journal article supplement (https://www.dovepress.com/article/271154)
Supplement: Supplementary file 1 [file get_supplementary_file.php]

**Supplementary Materials**

**Table S1.** Univariate analysis of associations between demographic/sleep-related variables and occupational outcomes. Continuous variables are compared using the Student *t*-test, while categorical variables are compared using the chi-squared test.

|  |  | **Missed work** |  | **p-value** | **Work errors** |  | **p-value** | **Asleep at work** |  | **p-value** |
| --- | --- | --- | --- | --- | --- | --- | --- | --- | --- | --- |
|  |  | **No** | **Yes** |  | **No** | **Yes** |  | **No** | **Yes** |  |
| **Age (years)** |  | 32.3 (10.8) | 27.8 (9.2) | **<0.0001** | 31.6 (10.7) | 27.0 (8.8) | **<0.0001** | 33.1 (10.6) | 28.3 (9.9) | **<0.0001** |
| **Gender** | **Male** | 61.1 | 38.9 | **0.027** | 78.4 | 21.6 | **<0.0001** | 50.6 | 49.4 | **<0.0001** |
|  | **Female** | 58.3 | 41.7 |  | 72.5 | 27.5 |  | 39.9 | 60.1 |  |
| **BMI (kg/m2)** |  | 27.7 (7.6) | 26.9 (8.0) | **<0.0001** | 27.7 (7.7) | 26.4 (8.1) | **<0.0001** | 28.2 (7.5) | 26.7 (8.0) | **<0.0001** |
| **Marital status** | **Married** | 68.4 | 31.6 | **<0.0001** | 83.2 | 12.6 | **<0.0001** | 55.3 | 44.7 | **<0.0001** |
|  | **Divorced** | 58.7 | 41.3 |  | 82.0 | 18.0 |  | 45.4 | 54.6 |  |
|  | **Single** | 52.7 | 47.3 |  | 77.8 | 22.2 |  | 37.8 | 62.2 |  |
|  | **Widowed** | 60.0 | 40.0 |  | 73.3 | 26.7 |  | 46.7 | 53.3 |  |
| **Type of employment** | **Manual** | 65.0 | 35.0 | **<0.005** | 77.1 | 22.9 | 0.41 | 43.8 | 56.3 | 0.27 |
|  | **Office** | 59.3 | 40.7 |  | 75.6 | 24.4 |  | 46.1 | 53.9 |  |
| **Sleeping medications** | **Never** | 62.6 | 37.4 | **<0.0001** | 77.9 | 22.1 | **<0.0001** | 47.1 | 52.9 | **<0.005** |
|  | **Several days/>50% days/every day** | 46.9 | 53.1 |  | 65.1 | 34.9 |  | 41.5 | 58.5 |  |
| **Subjective sleep quality** | **Very/fairly good** | 66..8 | 33.2 | **<0.0001** | 82.3 | 17.7 | **<0.0001** | 52.0 | 48.0 | **<0.0001** |
|  | **Very/fairly bad** | 49.7 | 50.3 |  | 65.7 | 34.3 |  | 36.8 | 63.2 |  |
| **Sleep latency** | **0-29 minutes** | 67.4 | 32.7 | **<0.0001** | 79.8 | 20.2 | **<0.0001** | 46.7 | 53.3 | 0.56 |
|  | **>30 minutes** | 56.6 | 43.4 |  | 74.0 | 26.0 |  | 46.0 | 54.0 |  |
| **Sleep duration (h)** |  | 6.34 (1.82) | 6.65 (2.23) | **<0.0001** | 6.44 (1.9) | 6.52 (2.3) | **0.178** | 6.47 (1.8) | 6.46 (2.2) | 0.849 |
| **Sleep efficiency (%)** |  | 85.1 (27.7) | 84.9 (33.1) | 0.70 | 85.1 (28.9) | 84.7 (33.3) | 0.545 | 84.3 (26.6) | 85.7 (32.6) | **0.054** |
| **Epworth Sleepiness Scale** | **Normal** | 59.5 | 40.5 | **<0.0001** | 78.1 | 21.9 | **<0.0001** | 44.3 | 55.7 | **<0.0001** |
|  | **Low** | 64.4 | 35.6 |  | 80.7 | 19.3 |  | 57.7 | 42.3 |  |
|  | **Moderate** | 53.4 | 46.6 |  | 61.8 | 38.2 |  | 24.0 | 76.0 |  |
|  | **Severe** | 47.8 | 52.2 |  | 52.6 | 47.4 |  | 15.6 | 84.4 |  |

**Table S2.** Multivariate analysis of associations between demographic/sleep-related variables and occupational outcomes. Values indicate odds ratios with 95% confidence intervals and associated p-values. NA = not applicable since not included in the model. Ref=reference variable.

|  |  | **Overall** | | | **Blue collar workers** | | | **White collar workers** | | |
| --- | --- | --- | --- | --- | --- | --- | --- | --- | --- | --- |
|  |  | **Missed work** | **Errors at work** | **Fell asleep at work** | **Missed work** | **Errors at work** | **Fell asleep at work** | **Missed work** | **Errors at work** | **Fell asleep at work** |
| **Age** |  | 0.95 (0.95-0.96 (p<0.001) | 0.95 (0.94-0.96; p<0.001) | 0.96 (0.96-0.97; p<0.001) | 0.97 (0.95-0.99; p=0.01) | 0.95 (0.92-0.98; p=0.002) | 0.97 (0.95-0.99; p=0.01) | 0.95 (0.94-0.96; p<0.001) | 0.95 (0.94-0.96; p<0.001) | 0.96 (0.96-0.97; p<0.001) |
| **Gender** | **Male; ref** | - | - | - | - | - | - | - | - | - |
|  | **Female** | 0.86 (0.76-0.97; p=0.019) | 1.10 (0.95-1.25; p=0.20) | 1.06 (0.93-1.20; p=0.38) | 0.76 (0.50-1.15; p=0.20) | 0.98 (0.62-1.56; p=0.93) | 0.70 (0.46-1.05; p=0.08) | 0.87 (0.76-0.99; p=0.03) | 1.11 (0.96-1.29; p=0.16) | 1.11 (0.97-1.26; p=0.09) |
| **BMI** |  | 1.01 (1.00-1.01; p=0.17) | 1.00 (0.99-1.01; p=0.74) | 1.00 (0.99-1.01; p=0.98) | 1.01 (0.99-1.04; p=0.36) | 1.00 (0.98-1.03; p=0.81) | 1.00 (0.97-1.02; p=0.71) | 1.01 (1.00-1.01; p=0.23) | 1.00 (0.99-1.01; p=0.77) | 1.00 (0.99-1.01; p=0.60) |
| **Marital status** | **Married, ref** | - | - | - | - | - | - | - | - | - |
|  | **Divorced** | 1.5 (1.07-2.0; p=0.02) | 1.11 (0.77-1.62; p=0.56) | 1.35 (0.98-1.86; p=0.07) | 1.12 (0.43-2.93; p=0.81) | 1.57 (0.57-4.34; p=0.39) | 1.19 (0.46-3.06; p=0.73) | 1.52 (1.09-2.12; p=0.01) | 1.06 (0.71-1.58; p=0.77) | 1.37 (0.97-1.93; p=0.07) |
|  | **Single** | 1.0 (0.87-1.19; p=0.78) | 0.89 (0.77-1.62; p=0.24) | 1.08 (0.92-1.26; p=0.37) | 1.15 (0.75-1.76; p=0.52) | 0.98 (0.60-1.61; p=0.93) | 0.97 (0.63-1.50; p=0.90) | 1.01 (0.85-1.19; p=0.95) | 0.89 (0.73-1.08; p=0.23) | 1.10 (0.93-1.30; p=0.29) |
|  | **Widowed** | 1.69 (0.60-4.96; p=0.34) | 1.73 (0.53-5.72; p=0.37) | 1.94 (0.67-5.64; p=0.22) | - | - | - | 1.55 (0.51-4.79; 0.44) | 1.44 (0.39-5.32; p=0.59) | 1.82 (0.61-5.46; p=0.28) |
| **Type of employment** | **Manual; ref** | - | NA | NA | NA | NA | NA | NA | NA | NA |
|  | **Office** | 1.24 (1.04-1.48; p=0.018) |  |  |  |  |  |  |  |  |
| **Sleeping medications** | **Never; ref** | - | - | - | - | - | - | - | - | - |
|  | **Sometimes (several days, >half of days, nearly every day)** | 1.92 (1.67-2.22; p<0.001) | 1.89 (1.62-2.20; p<0.001) | 1.16 (1.00-1.35; p=0.06) | 1.62 (1.06-2.49; p=0.03) | 2.01 (1.27-3.19; p=0.003) | 1.58 (0.99-2.50; p=0.06) | 1.97 (1.69-2.30; p<0.001) | 1.87 (1.59-2.20; p<0.001) | 1.11 (0.95-1.31; p=0.20) |
| **Subjective sleep quality** | **Good (very or fairly); ref** |  |  | - |  |  | - |  |  | - |
|  | **Bad (very or fairly)** |  |  | 1.55 (1.38-1.74; p<0.001) |  |  | 1.61 (1.11-2.34; p=0.01) |  |  | 1.53 (1.36-1.74; p=0.001) |
| **Sleep latency** | **0-29 minutes** |  |  | NA |  |  | NA |  |  | NA |
|  | **>30 minutes** |  |  |  |  |  |  |  |  | 0.96 (0.85-1.08; p=0.50) |
| **Hours of sleep** |  |  |  | NA |  |  | NA |  |  | NA |
| **Sleep efficiency** |  |  |  | 1.00 (1.00-1.00; p=0.47) |  |  | 1.00 (0.99-1.01; p=0.84) |  |  | 1.00 (1.00-1.00; p=0.50) |
| **ESS** | **Normal; ref** |  |  | - |  |  | - |  |  | - |
|  | **Mild** |  |  | 0.57 (0.51-0.63; p<0.001) |  |  | 0.73 (0.51-1.04; p=0.084) |  |  | 0.55 (0.49-0.62; p<0.001) |
|  | **Moderate** |  |  | 2.33 (1.90-2.86; p<0.001) |  |  | 2.81 (1.48-5.34; p=0.002) |  |  | 2.29 (1.85-2.84; p<0.001) |
|  | **Severe** |  |  | 3.39 (2.51-4.58; p<0.001) |  |  | 3.18 (1.24-8.19; p=0.02) |  |  | 3.40 (2.48-4.68; p<0.001) |

**Supplementary Information: Questionnaire used in this study**

**SECTION 1: Thinking about your sleep over the last month…**

1.How long does it take you to fall asleep?

0–5 mins, 5–15 mins, 15–30 mins, or more than 30 mins

2.How many hours of sleep do you normally get (excluding naps)?

[free text-number]

3. On a typical ‘working’ day, what time would do you go to bed?

[free text-time]

4. On a typical ‘working’ day, what time would do you go to sleep?

[free text-time]

5. During the past month, how would you rate your sleep quality overall?

Very good, Fairly good, Fairly bad, Very bad

**SECTION 2: About your sleepiness during the day…**

6. How likely are you to doze off or fall asleep sitting and reading?

Would never doze/slight chance of dozing/moderate chance of dozing/high chance of dozing

7. How likely are you to doze off or fall asleep watching TV?

Would never doze/slight chance of dozing/moderate chance of dozing/high chance of dozing

8. How likely are you to doze off or fall asleep sitting, inactive in a public place (e.g. a theatre or a meeting)?

Would never doze/slight chance of dozing/moderate chance of dozing/high chance of dozing

9. How likely are you to doze off or fall asleep as a passenger in a car for an hour without a break?

Would never doze/slight chance of dozing/moderate chance of dozing/high chance of dozing

10. How likely are you to doze off or fall asleep lying down to rest in the afternoon when circumstances permit?

Would never doze/slight chance of dozing/moderate chance of dozing/high chance of dozing

11. How likely are you to doze off or fall asleep sitting and talking to someone?

Would never doze/slight chance of dozing/moderate chance of dozing/high chance of dozing

12. How likely are you to doze off or fall asleep sitting quietly after a lunch without alcohol?

Would never doze/slight chance of dozing/moderate chance of dozing/high chance of dozing

13. How likely are you to doze off or fall asleep in a car, while stopped for a few minutes in the traffic?

Would never doze/slight chance of dozing/moderate chance of dozing/high chance of dozing

**SECTION 3: About your sleep and employment…**

14. Have you fallen asleep or nearly fallen asleep on the job in the past three months?

Yes/No

15. How many days within the past three months have you missed work because you were too sleepy or you had a sleep problem?

Yes/No

16. Thinking about the past three months, how many days did you make errors at work because you were too sleepy or you had a sleep problem?

Yes/No

**SECTION 4: About you…**

17. What is your gender?

Male/Female

18. How old are you?

[free text-number]

19. How tall are you (in cm)

[free text-number]

20. How much do you weigh (in kg)?

[free text-number]

21. What is your marital status?

Married/Common law, Single, Separated, Divorced, Widowed

22. What is you work type?

Office/Manual

23. Over the past one month, how many times did you take medication (with or without a prescription) to help you sleep?

Never/Several days/>50% of days/Nearly Every Day
